# Supplementary material for: There and back again; historical perspective and future directions for Vaccinium breeding and research studies
Source: PubMed Central journal article supplement (PMC9123236; doi:10.1093/hr/uhac083), 2022-04-11
Supplement: web_material_uhac083.pdf [file web_material_uhac083.pdf]

**Supplemental Table 1.** Metabolites identified in different organs of *Vaccinium* spp. at different developmental stages and experimental conditions.

| Species              | Metabolite class      | Organ  | Developmental stage    | Experimental condition | References                                                                         |
|----------------------|-----------------------|--------|------------------------|------------------------|------------------------------------------------------------------------------------|
| <i>V. corymbosum</i> | Primary metabolites   | Fruits | Fruit set              |                        | (Montecchiarini et al., 2019)                                                      |
|                      |                       |        | Maturity (ripe fruits) |                        | (Kim et al., 2015; Lee et al., 2014; Montecchiarini et al., 2019; Qi et al., 2021) |
|                      |                       | Leaves | Vegetative             | Aluminum toxicity      | (Cárcamo-Fincheira et al., 2021)                                                   |
|                      |                       | Roots  | Vegetative             | Aluminum toxicity      | (Cárcamo-Fincheira et al., 2021)                                                   |
|                      | Organic acids         | Fruits | Maturity (ripe fruits) |                        | (Wang et al., 2019)                                                                |
|                      | Secondary metabolites | Fruits | Maturity (ripe fruits) |                        | (Ma et al., 2013; Qi et al., 2021)                                                 |
|                      | Phenolic compounds    | Fruits | Fruit development      |                        | (Castrejón et al., 2008; Günther et al., 2020; Li et al., 2019)                    |

|              |        |                        |                    |                                                                                                                                     |
|--------------|--------|------------------------|--------------------|-------------------------------------------------------------------------------------------------------------------------------------|
|              |        | Maturity (ripe fruits) |                    | (Kim et al., 2015; Lee et al., 2014; Mengist et al., 2020)                                                                          |
|              | Leaves | Vegetative             | UV-B treatment     | (Inostroza-Blancheteau et al., 2014; Luengo Escobar, Alberdi, et al., 2017; Luengo Escobar, Magnum de Oliveira Silva, et al., 2017) |
| Flavonoids   | Fruits | Fruit development      |                    | (Zifkin et al., 2012)                                                                                                               |
|              |        | Maturity (ripe fruits) |                    | (Wang et al., 2019)                                                                                                                 |
| Anthocyanins | Fruits | Fruit development      |                    | (Günther et al., 2020; Li et al., 2019)                                                                                             |
|              |        |                        | UV radiation       | (Yang et al., 2019)                                                                                                                 |
|              |        | Maturity (ripe fruits) |                    | (Lohachoompol et al., 2008)                                                                                                         |
|              |        |                        | Altitude           | (Zoratti et al., 2015a)                                                                                                             |
|              |        |                        | Sunlight radiation | (Zoratti et al., 2015b)                                                                                                             |
| Flavonols    | Fruits | Fruit development      | UV radiation       | (Yang et al., 2019)                                                                                                                 |

|                                          |                |                           |                           |                                                                                                       |
|------------------------------------------|----------------|---------------------------|---------------------------|-------------------------------------------------------------------------------------------------------|
|                                          | Leaves         | Vegetative                | UV-B                      | (Luengo Escobar, Alberdi, et al., 2017;<br>Luengo Escobar, Magnum de Oliveira Silva,<br>et al., 2017) |
| Volatile compounds                       | Fruits         | Maturity (ripe fruits)    |                           | (Du & Rouseff, 2014; Ferrão et al., 2020;<br>Polashock et al., 2007; Saftner et al., 2008)            |
|                                          |                |                           | Location, harvest<br>date | (Du et al., 2011)                                                                                     |
|                                          |                |                           | UV-B                      | (Eichholz et al., 2011)                                                                               |
| Triterpenoids,<br>Non-polar<br>compounds | Leaves         | Before flowering          |                           | (Vrancheva et al., 2021)                                                                              |
| Iridoids                                 | Floral<br>buds | Flower bud<br>development |                           | (Leisner et al., 2017)                                                                                |
|                                          | Fruits         | Maturity (ripe fruits)    |                           | (Heffels et al., 2017; Leisner et al., 2017)                                                          |
|                                          | Leaves         | Maturity (ripe fruits)    |                           | (Leisner et al., 2017)                                                                                |
|                                          | Stems          | Maturity (ripe fruits)    |                           | (Leisner et al., 2017)                                                                                |

|    |                         |                        |        |                        |                                             |
|----|-------------------------|------------------------|--------|------------------------|---------------------------------------------|
| 1  |                         |                        |        |                        |                                             |
| 2  |                         |                        |        |                        |                                             |
| 3  | <i>V. virgatum</i>      | Secondary metabolites  | Fruits | Maturity (ripe fruits) | (Ma et al., 2013)                           |
| 4  |                         |                        |        |                        |                                             |
| 5  |                         |                        |        |                        |                                             |
| 6  |                         | Polyphenolic compounds | Fruits | Fruit development      | (Günther et al., 2020)                      |
| 7  |                         |                        |        |                        |                                             |
| 8  |                         |                        |        |                        |                                             |
| 9  |                         |                        |        |                        |                                             |
| 10 |                         | Anthocyanins           | Fruits | Fruit development      | (Günther et al., 2020)                      |
| 11 |                         |                        |        |                        |                                             |
| 12 |                         |                        |        |                        |                                             |
| 13 |                         |                        |        | Maturity (ripe fruits) | (Lohachoompol et al., 2008)                 |
| 14 |                         |                        |        |                        |                                             |
| 15 |                         |                        |        |                        |                                             |
| 16 |                         |                        |        |                        |                                             |
| 17 | <i>V. angustifolium</i> | Whole metabolome       | Leaves | Reproductive           | (Markus et al., 2015)                       |
| 18 |                         |                        |        |                        |                                             |
| 19 |                         |                        |        |                        |                                             |
| 20 |                         | Secondary metabolites  | Fruits | Maturity (ripe fruits) | (Ma et al., 2013)                           |
| 21 |                         |                        |        |                        |                                             |
| 22 |                         | Phenolic compounds     | Fruits | Maturity (ripe fruits) | (Harris et al., 2007; Mengist et al., 2020) |
| 23 |                         |                        |        |                        |                                             |
| 24 |                         |                        |        |                        |                                             |
| 25 |                         |                        |        |                        |                                             |
| 26 |                         |                        | Leaves | Maturity (ripe fruits) | (Harris et al., 2007)                       |
| 27 |                         |                        |        |                        |                                             |
| 28 |                         |                        |        |                        |                                             |
| 29 |                         |                        | Roots  | Maturity (ripe fruits) | (Harris et al., 2007)                       |
| 30 |                         |                        |        |                        |                                             |
| 31 |                         |                        |        |                        |                                             |
| 32 |                         |                        | Stems  | Maturity (ripe fruits) | (Harris et al., 2007)                       |
| 33 |                         |                        |        |                        |                                             |
| 34 |                         |                        |        |                        |                                             |
| 35 |                         | Iridoids               | Fruits | Maturity (ripe fruits) | (Heffels et al., 2017)                      |
| 36 |                         |                        |        |                        |                                             |
| 37 |                         |                        |        |                        |                                             |
| 38 | <i>V. macrocarpon</i>   | Whole metabolome       | Leaves | Reproductive           | (Markus et al., 2015)                       |
| 39 |                         |                        |        |                        |                                             |
| 40 |                         |                        |        |                        |                                             |
| 41 |                         |                        |        |                        |                                             |
| 42 |                         |                        |        |                        |                                             |
| 43 |                         |                        |        |                        |                                             |
| 44 |                         |                        |        |                        |                                             |
| 45 |                         |                        |        |                        |                                             |
| 46 |                         |                        |        |                        |                                             |
| 47 |                         |                        |        |                        |                                             |

|    |                       |                                    |        |                        |                                                         |
|----|-----------------------|------------------------------------|--------|------------------------|---------------------------------------------------------|
| 1  |                       |                                    |        |                        |                                                         |
| 2  |                       |                                    |        |                        |                                                         |
| 3  |                       |                                    |        |                        |                                                         |
| 4  |                       | Polar compounds                    | Fruits | Maturity (ripe fruits) | (Hurkova et al., 2019)                                  |
| 5  |                       |                                    |        |                        |                                                         |
| 6  |                       | Organic acids                      | Fruits | Maturity (ripe fruits) | (Fong et al., 2020, 2021)                               |
| 7  |                       |                                    |        |                        |                                                         |
| 8  |                       |                                    |        |                        |                                                         |
| 9  |                       |                                    |        |                        |                                                         |
| 10 |                       | Phenolic compounds                 | Fruits | Maturity (ripe fruits) | (Wang et al., 2018)                                     |
| 11 |                       |                                    |        |                        |                                                         |
| 12 |                       |                                    |        |                        |                                                         |
| 13 |                       | Anthocyanins                       | Fruits | Maturity (ripe fruits) | (Vorsa & Polashock, 2005)                               |
| 14 |                       |                                    |        |                        |                                                         |
| 15 |                       |                                    |        |                        |                                                         |
| 16 |                       |                                    |        |                        |                                                         |
| 17 |                       | Non-volatile compounds             | Fruits | Maturity (ripe fruits) | (Brown, Murch, et al., 2012; Brown, Turi, et al., 2012) |
| 18 |                       |                                    |        |                        |                                                         |
| 19 |                       |                                    |        |                        |                                                         |
| 20 |                       |                                    |        |                        |                                                         |
| 21 |                       |                                    |        |                        |                                                         |
| 22 | <i>V. oxycoccos</i>   | Anthocyanins                       | Fruits | Maturity (ripe fruits) | (Vorsa & Polashock, 2005)                               |
| 23 |                       |                                    |        |                        |                                                         |
| 24 |                       |                                    |        |                        |                                                         |
| 25 |                       |                                    |        |                        |                                                         |
| 26 |                       | Non-volatile compounds             | Fruits | Maturity (ripe fruits) | (Brown, Turi, et al., 2012)                             |
| 27 |                       |                                    |        |                        |                                                         |
| 28 |                       |                                    |        |                        |                                                         |
| 29 |                       |                                    |        |                        |                                                         |
| 30 | <i>V. vitis-idaea</i> | Polar compounds                    | Fruits | Maturity (ripe fruits) | (Hurkova et al., 2019)                                  |
| 31 |                       |                                    |        |                        |                                                         |
| 32 |                       |                                    |        |                        |                                                         |
| 33 |                       | Fatty acids                        | Leaves | Whole growing season   | (Liu et al., 2014)                                      |
| 34 |                       |                                    |        |                        |                                                         |
| 35 |                       |                                    |        |                        |                                                         |
| 36 |                       | Phenolic compounds                 | Leaves | Whole growing season   | (Liu et al., 2014)                                      |
| 37 |                       |                                    |        |                        |                                                         |
| 38 |                       |                                    |        |                        |                                                         |
| 39 |                       | Triterpenoids, Non-polar compounds | Leaves | Before flowering       | (Vrancheva et al., 2021)                                |
| 40 |                       |                                    |        |                        |                                                         |
| 41 |                       |                                    |        |                        |                                                         |
| 42 |                       |                                    |        |                        |                                                         |
| 43 |                       |                                    |        |                        |                                                         |
| 44 |                       |                                    |        |                        |                                                         |
| 45 |                       |                                    |        |                        |                                                         |
| 46 |                       |                                    |        |                        |                                                         |
| 47 |                       |                                    |        |                        |                                                         |

|    |                     |                        |         |                        |                                                  |
|----|---------------------|------------------------|---------|------------------------|--------------------------------------------------|
| 1  |                     |                        |         |                        |                                                  |
| 2  |                     |                        |         |                        |                                                  |
| 3  |                     |                        |         |                        |                                                  |
| 4  |                     | Non-volatile compounds | Fruits  | Maturity (ripe fruits) | (Brown, Turi, et al., 2012)                      |
| 5  |                     |                        |         |                        |                                                  |
| 6  |                     |                        |         |                        |                                                  |
| 7  | <i>V. myrtillus</i> | Primary metabolites    | Fruits  | Fruit development      | (Ayaz et al., 2001)                              |
| 8  |                     |                        |         |                        |                                                  |
| 9  |                     |                        |         |                        |                                                  |
| 10 |                     |                        |         | Maturity (ripe fruits) | Location                                         |
| 11 |                     |                        |         |                        | (Elisabetta et al., 2013; Rohloff et al., 2015)  |
| 12 |                     |                        |         |                        |                                                  |
| 13 |                     |                        |         |                        |                                                  |
| 14 |                     |                        |         |                        | Climate,                                         |
| 15 |                     |                        |         |                        | temperature,                                     |
| 16 |                     |                        |         |                        | photoperiod                                      |
| 17 |                     |                        |         |                        |                                                  |
| 18 |                     |                        |         |                        |                                                  |
| 19 |                     |                        |         | Fertilizer, soil       | (Rohloff et al., 2015)                           |
| 20 |                     |                        |         |                        |                                                  |
| 21 |                     |                        |         |                        |                                                  |
| 22 |                     | Fatty acids            | Leaves  | Whole growing season   | (Liu et al., 2014)                               |
| 23 |                     |                        |         |                        |                                                  |
| 24 |                     |                        |         |                        |                                                  |
| 25 |                     | Secondary metabolites  | Fruits  | Maturity (ripe fruits) | Location                                         |
| 26 |                     |                        |         |                        | (Elisabetta et al., 2013)                        |
| 27 |                     |                        |         |                        |                                                  |
| 28 |                     | Phenolic compounds     | Flowers | Flowering              | (Riihinen et al., 2008)                          |
| 29 |                     |                        |         |                        |                                                  |
| 30 |                     |                        | Fruits  | Maturity (ripe fruits) | (Ancillotti et al., 2016; Riihinen et al., 2008) |
| 31 |                     |                        |         |                        |                                                  |
| 32 |                     |                        |         |                        |                                                  |
| 33 |                     |                        |         |                        |                                                  |
| 34 |                     |                        |         | Location               | (Mikulic-Petkovsek et al., 2015)                 |
| 35 |                     |                        |         |                        |                                                  |
| 36 |                     |                        |         |                        |                                                  |
| 37 |                     |                        |         |                        |                                                  |
| 38 |                     |                        |         | Temperature,           | (Uleberg et al., 2012)                           |
| 39 |                     |                        |         | photoperiod            |                                                  |
| 40 |                     |                        |         |                        |                                                  |
| 41 |                     |                        |         |                        |                                                  |
| 42 |                     |                        |         |                        |                                                  |
| 43 |                     |                        |         |                        |                                                  |
| 44 |                     |                        |         |                        |                                                  |
| 45 |                     |                        |         |                        |                                                  |
| 46 |                     |                        |         |                        |                                                  |
| 47 |                     |                        |         |                        |                                                  |

1  
2  
3  
4  
5  
6  
7  
8  
9  
10  
11  
12  
13  
14  
15  
16  
17  
18  
19  
20  
21  
22  
23  
24  
25  
26  
27  
28  
29  
30  
31  
32  
33  
34  
35  
36  
37  
38  
39  
40  
41  
42  
43  
44  
45  
46  
47

|                                          |         |                        |                    |                                                                        |
|------------------------------------------|---------|------------------------|--------------------|------------------------------------------------------------------------|
|                                          | Leaves  | Whole growing season   |                    | (Liu et al., 2014)                                                     |
|                                          |         | Maturity (ripe fruits) |                    | (Riihinen et al., 2008)                                                |
|                                          | Rhizome | Maturity (ripe fruits) |                    | (Riihinen et al., 2008)                                                |
| Flavonoids                               | Leaves  | Maturity (ripe fruits) | Solar radiation    | (Jaakola et al., 2004)                                                 |
|                                          | Fruits  | Fruit development      |                    | (Jaakola et al., 2002)                                                 |
|                                          | Fruits  | Maturity (ripe fruits) | Solar radiation    | (Jaakola et al., 2004)                                                 |
| Proanthocyanidins                        | Fruits  | Fruit development      |                    | (Suvanto et al., 2020)                                                 |
|                                          |         | Maturity (ripe fruits) | Location           | (Åkerström et al., 2010)                                               |
| Anthocyanins                             | Fruits  | Maturity (ripe fruits) |                    | (Benvenuti et al., 2018; Lätti et al., 2008)                           |
|                                          |         |                        | Location/altitude  | (Åkerström et al., 2010; Primetta et al., 2013; Zoratti et al., 2015a) |
|                                          |         |                        | Sunlight radiation | (Zoratti et al., 2015b)                                                |
| Triterpenoids,<br>Non-polar<br>compounds | Leaves  | Before flowering       |                    | (Vrancheva et al., 2021)                                               |

|                      |                                    |        |                        |                                                 |
|----------------------|------------------------------------|--------|------------------------|-------------------------------------------------|
|                      | Iridoids                           | Fruits | Maturity (ripe fruits) | (Heffels et al., 2017)                          |
| <i>V. bracteatum</i> | Primary metabolites                | Fruits | Maturity (ripe fruits) | (Lee et al., 2014)                              |
|                      | Secondary metabolites              | Fruits | Maturity (ripe fruits) | (Lee et al., 2014)                              |
|                      |                                    | Leaves | Post-budding stages    | (Fan et al., 2018, 2019, 2020)                  |
| <i>V. uliginosum</i> | Phenolic compounds                 | Fruits | Maturity (ripe fruits) | (Ancillotti et al., 2016)                       |
|                      | Proanthocyanidins, Anthocyanins    | Fruits | Maturity (ripe fruits) | (Kellogg et al., 2010)                          |
|                      | Triterpenoids, Non-polar compounds | Leaves | Before flowering       | (Vrancheva et al., 2021)                        |
|                      | Iridoids                           | Fruits | Maturity (ripe fruits) | (Heffels et al., 2017)                          |
| <i>V. elliotii</i>   | Organic acids                      | Fruits | Maturity (ripe fruits) | (Yifei Wang et al., 2019)                       |
|                      | Phenolic compounds                 | Fruits | Maturity (ripe fruits) | (Mengist et al., 2020; Yifei Wang et al., 2019) |
|                      | Iridoids                           | Fruits | Maturity (ripe fruits) | (Leisner et al., 2017)                          |



|    |                          |                                 |        |                        |                           |
|----|--------------------------|---------------------------------|--------|------------------------|---------------------------|
| 1  |                          |                                 |        |                        |                           |
| 2  |                          |                                 |        |                        |                           |
| 3  | <i>V. oldhamii</i>       | Primary metabolites             | Fruits | Maturity (ripe fruits) | (Lee et al., 2014)        |
| 4  |                          |                                 |        |                        |                           |
| 5  |                          |                                 |        |                        |                           |
| 6  |                          | Secondary metabolites           | Fruits | Maturity (ripe fruits) | (Lee et al., 2014)        |
| 7  |                          |                                 |        |                        |                           |
| 8  |                          |                                 |        |                        |                           |
| 9  | <i>V. ovalifolium</i>    | Whole metabolome                | Leaves | Reproductive           | (Markus et al., 2015)     |
| 10 |                          |                                 |        |                        |                           |
| 11 |                          | Proanthocyanidins, Anthocyanins | Fruits | Maturity (ripe fruits) | (Kellogg et al., 2010)    |
| 12 |                          |                                 |        |                        |                           |
| 13 |                          |                                 |        |                        |                           |
| 14 |                          |                                 |        |                        |                           |
| 15 |                          |                                 |        |                        |                           |
| 16 | <i>V. arboreum</i>       | Iridoids                        | Fruits | Maturity (ripe fruits) | (Leisner et al., 2017)    |
| 17 |                          |                                 |        |                        |                           |
| 18 | <i>V. arctostaphylos</i> | Primary metabolites             | Fruits | Fruit development      | (Ayaz et al., 2001)       |
| 19 |                          |                                 |        |                        |                           |
| 20 |                          |                                 |        |                        |                           |
| 21 | <i>V. boreale</i>        | Organic acids, Flavonoids       | Fruits | Maturity (ripe fruits) | (Yifei Wang et al., 2019) |
| 22 |                          |                                 |        |                        |                           |
| 23 |                          |                                 |        |                        |                           |
| 24 |                          |                                 |        |                        |                           |
| 25 | <i>V. calycinium</i>     | Iridoids                        | Fruits | Maturity (ripe fruits) | (Leisner et al., 2017)    |
| 26 |                          |                                 |        |                        |                           |
| 27 |                          |                                 |        |                        |                           |
| 28 | <i>V. consanguineum</i>  | Iridoids                        | Fruits | Maturity (ripe fruits) | (Leisner et al., 2017)    |
| 29 |                          |                                 |        |                        |                           |
| 30 |                          |                                 |        |                        |                           |
| 31 | <i>V. corymbodendron</i> | Iridoids                        | Fruits | Maturity (ripe fruits) | (Leisner et al., 2017)    |
| 32 |                          |                                 |        |                        |                           |
| 33 |                          |                                 |        |                        |                           |
| 34 | <i>V. cylindraceum</i>   | Iridoids                        | Fruits | Maturity (ripe fruits) | (Leisner et al., 2017)    |
| 35 |                          |                                 |        |                        |                           |
| 36 |                          |                                 |        |                        |                           |
| 37 | <i>V. darrowii</i>       | Organic acids, Flavonoids       | Fruits | Maturity (ripe fruits) | (Yifei Wang et al., 2019) |
| 38 |                          |                                 |        |                        |                           |
| 39 |                          |                                 |        |                        |                           |
| 40 |                          |                                 |        |                        |                           |
| 41 |                          |                                 |        |                        |                           |
| 42 |                          |                                 |        |                        |                           |
| 43 |                          |                                 |        |                        |                           |
| 44 |                          |                                 |        |                        |                           |
| 45 |                          |                                 |        |                        |                           |
| 46 |                          |                                 |        |                        |                           |
| 47 |                          |                                 |        |                        |                           |

|    |                       |                              |        |                        |                           |
|----|-----------------------|------------------------------|--------|------------------------|---------------------------|
| 1  |                       |                              |        |                        |                           |
| 2  |                       |                              |        |                        |                           |
| 3  | <i>V. floribundum</i> | Iridoids                     | Fruits | Maturity (ripe fruits) | (Leisner et al., 2017)    |
| 4  |                       |                              |        |                        |                           |
| 5  |                       |                              |        |                        |                           |
| 6  | <i>V. fuscatum</i>    | Iridoids                     | Fruits | Maturity (ripe fruits) | (Leisner et al., 2017)    |
| 7  |                       |                              |        |                        |                           |
| 8  |                       |                              |        |                        |                           |
| 9  | <i>V. ovatum</i>      | Iridoids                     | Fruits | Maturity (ripe fruits) | (Leisner et al., 2017)    |
| 10 |                       |                              |        |                        |                           |
| 11 |                       |                              |        |                        |                           |
| 12 | <i>V. padifolium</i>  | Iridoids                     | Fruits | Maturity (ripe fruits) | (Leisner et al., 2017)    |
| 13 |                       |                              |        |                        |                           |
| 14 | <i>V. pallidum</i>    | Organic acids,<br>Flavonoids | Fruits | Maturity (ripe fruits) | (Yifei Wang et al., 2019) |
| 15 |                       |                              |        |                        |                           |
| 16 |                       |                              |        |                        |                           |
| 17 |                       |                              |        |                        |                           |
| 18 | <i>V. reticulatum</i> | Iridoids                     | Fruits | Maturity (ripe fruits) | (Leisner et al., 2017)    |
| 19 |                       |                              |        |                        |                           |
| 20 |                       |                              |        |                        |                           |
| 21 | <i>V. stamineum</i>   | Iridoids                     | Fruits | Maturity (ripe fruits) | (Leisner et al., 2017)    |
| 22 |                       |                              |        |                        |                           |
| 23 |                       |                              |        |                        |                           |
| 24 | <i>V. tenellum</i>    | Organic acids,<br>Flavonoids | Fruits | Maturity (ripe fruits) | (Yifei Wang et al., 2019) |
| 25 |                       |                              |        |                        |                           |
| 26 |                       |                              |        |                        |                           |
| 27 |                       |                              |        |                        |                           |
| 28 |                       |                              |        |                        |                           |
| 29 |                       |                              |        |                        |                           |
| 30 |                       |                              |        |                        |                           |
| 31 |                       |                              |        |                        |                           |
| 32 |                       |                              |        |                        |                           |
| 33 |                       |                              |        |                        |                           |
| 34 |                       |                              |        |                        |                           |
| 35 |                       |                              |        |                        |                           |
| 36 |                       |                              |        |                        |                           |
| 37 |                       |                              |        |                        |                           |
| 38 |                       |                              |        |                        |                           |
| 39 |                       |                              |        |                        |                           |
| 40 |                       |                              |        |                        |                           |
| 41 |                       |                              |        |                        |                           |
| 42 |                       |                              |        |                        |                           |
| 43 |                       |                              |        |                        |                           |
| 44 |                       |                              |        |                        |                           |
| 45 |                       |                              |        |                        |                           |
| 46 |                       |                              |        |                        |                           |
| 47 |                       |                              |        |                        |                           |
